# Supplementary material
Source: PubMed Central journal article supplement (PMC3849919)
Supplement: NIHMS54158-supplement-1.pdf [file NIHMS54158-supplement-1.pdf]

**Figure S1**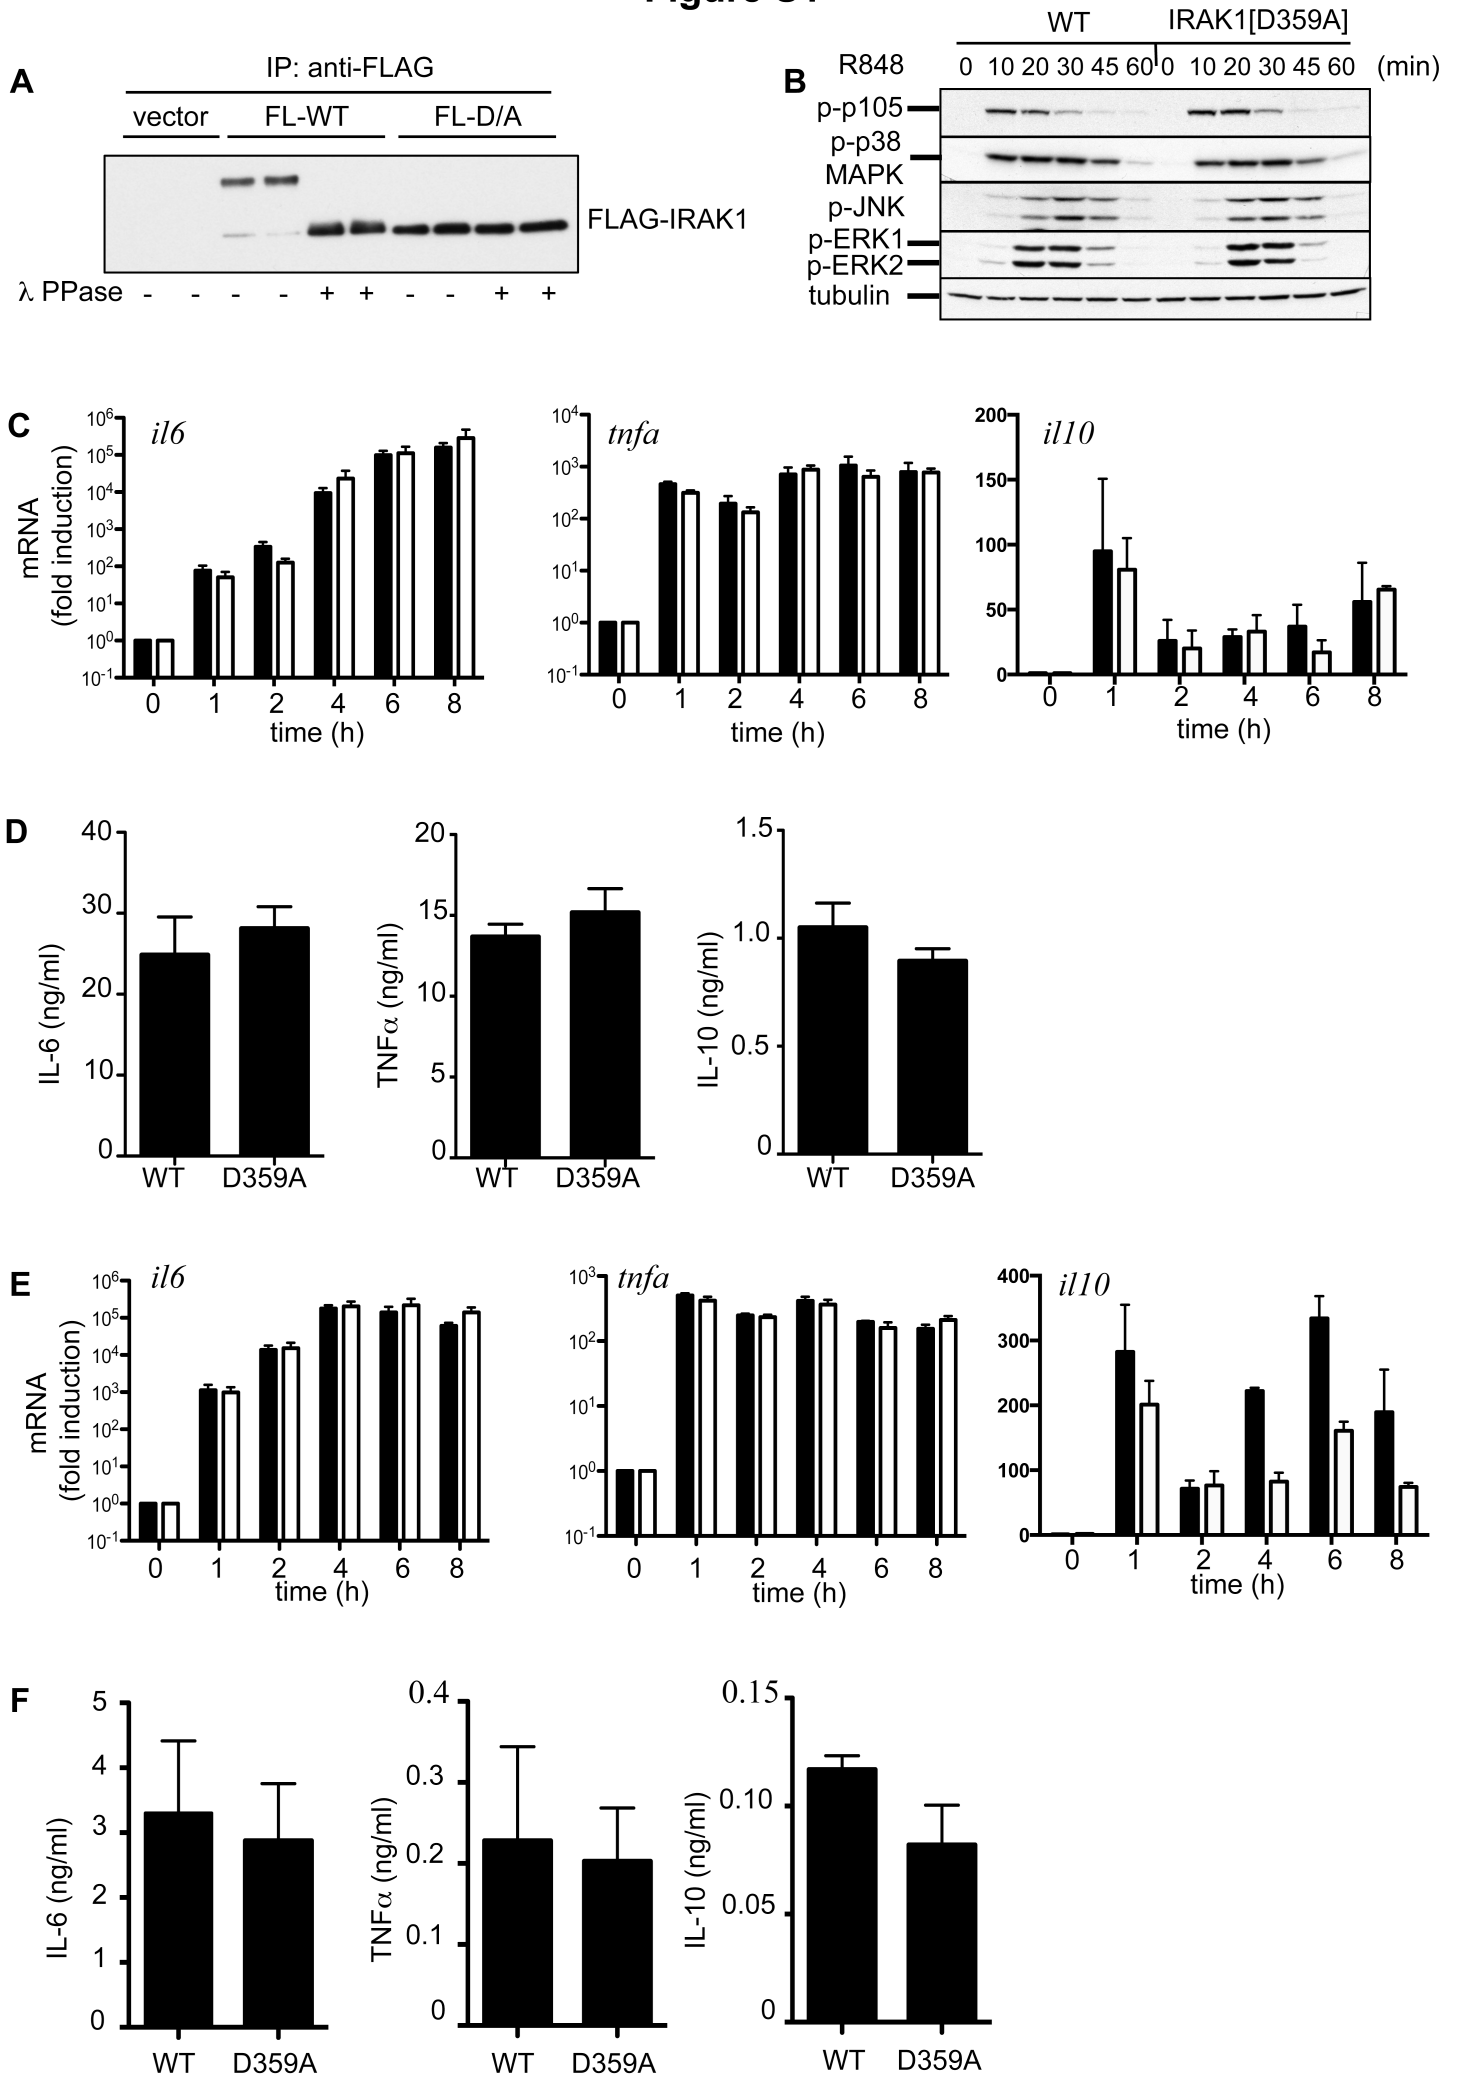

Supplementary Table I

| IRAK2 primers                                      |                                                                            |
|----------------------------------------------------|----------------------------------------------------------------------------|
| primer                                             | sequence                                                                   |
| <i>Primers for vector cloning</i>                  |                                                                            |
| Arm1 sense                                         | gagcggccgcGTACTAACCACAGTGTAGTACAATCAGGCTTGAAAGATCC                         |
| Arm1 antisense                                     | aaggccggccatataatcctgcaggTACCAACCCACCCTAGCAGACACATTTTC                     |
| Arm2 sense                                         | tcctgcaggataaactcgtataatgtatgctatacgaagttaTGGTATATCCTGACTGAGCATATTAGC      |
| Arm2 antisense                                     | ttgccggcCAGCACTTGGGAGGCAGAAACAGG                                           |
| Arm3 sense                                         | agggcgcgccataaactcgtataatgtatgctatacgaagttatctagaGGATTAAAGGTGTGCGCCACTACGC |
| Arm3 antisense                                     | ttctcgagGCATGTCATAGCTTATGCCGTTGCAGG                                        |
| Splice donor sense                                 | aaccggtgtgccATGATGGCATCGTGCCAGGGG                                          |
| Splice donor antisense                             | taccggttaattaacatatgCAGCACTTGGGAGGCAGAAACAGG                               |
| <i>IRAK2 screening / genotyping primers</i>        |                                                                            |
| RNA sense (p1)                                     | CCTCGGTGCACATGCTTTACATGTG                                                  |
| RNA antisense (p2)                                 | AGAGTACGATGTTCTCCATCAGTCTC                                                 |
| <i>Positive clones give 317bp band</i>             |                                                                            |
| 5' loxP sense (p3)                                 | TGAGATTTATTTCCCCAGACCAGCAAG                                                |
| 5' loxP antisense (p4)                             | CCTAAAGCTGGCCCTCAAGCTATTC                                                  |
| <i>300bp wild type, 350bp targeted</i>             |                                                                            |
| 3' loxP sense (p5)                                 | TCCTCTCCACTCTTCACGGGAC                                                     |
| 3' loxP antisense (p6)                             | GCGTAGTGGCGCACACCTTTAATC                                                   |
| <i>500bp wild type, 600bp neo excised targeted</i> |                                                                            |
| <i>IRAK1 genotyping primers</i>                    |                                                                            |
| Sense                                              | CAATGAACAGCTCTGTTCTGAGTGTC                                                 |
| Antisense (floxed)                                 | CCAAATGGTCCTGATAAACTGGACTAG                                                |
| Antisense (knockout)                               | ACCAAAACCATGTAICTCAGATGCTAAGC                                              |
| 273bp wild type, 389bp floxed, 490bp knockout      |                                                                            |

Sequences of primers used for generating IRAK2[E525A] mice and routine genotyping of IRAK2[E525A] and IRAK1[D359A] knock-in mice.

## Supplementary Figure

**Figure S1. Signalling and cytokine production in BMDM from IRAK1[D359A] mice.** (A) IL-1R cells were transfected with plasmids encoding FLAG-tagged wild type human IRAK1 (FL-WT) or the IRAK1[D358A] mutant (FL-D/A) or empty vector (vector). The cells were lysed after 24 h and IRAK1 immunoprecipitated from 0.25 mg of cell extract protein with anti-FLAG. The Immunoprecipitates were resuspended and incubated in the absence or presence of phage  $\lambda$  phosphatase ( $\lambda$ PPase) (see Methods), followed by SDS-PAGE and immuno-blotting with an anti-FLAG antibody. (B) Primary BMDM from wild-type and IRAK1[D359A] mice were stimulated for the times indicated with 1  $\mu$ g/ml R848 and lysed. The extracts were denatured in SDS, subjected to SDS-PAGE, and immunoblotted with the antibodies indicated. (C) BMDM from wild-type (black bars) and IRAK1[D359A] (white bars) mice were stimulated for the times indicated with 1.0  $\mu$ g/ml R848. RNA was extracted from the cells and *il6* (left hand panels), *tnfa* (middle panels) or *il10* (right hand panels) mRNA measured by qPCR. The results are plotted as fold-increase in mRNA relative to the level determined in unstimulated cells. Error bars represent the mean  $\pm$  SEM for experiments with BMDM from three mice of each genotype. The data shown is representative of two independent experiments. (D) BMDM from wild-type and IRAK1[D359A] mice were stimulated for 24 h with 1  $\mu$ g/ml R848 for the times indicated. The cell culture medium was collected and IL-6, TNF $\alpha$  and IL-10 were measured by ELISA. Error bars represent the mean  $\pm$  SD for experiments with BMDM from three mice of each genotype. The data shown is representative of three independent experiments. (E) As in C, except that the cells were stimulated with LPS. (F) As in D, except that the cells were stimulated with LPS.
